1           **3D8, a nucleic acid-hydrolyzing scFv, confers antiviral activity**  
2                   **against SARS-CoV-2 and multiple coronaviruses *in vitro***

3  
4   Gunsup Lee<sup>1¶</sup>, Shailesh Budhathoki<sup>2¶</sup>, Hyeok Soon Choi<sup>1,3</sup>, Kwang-ji Oh<sup>1</sup>, Geum-Young Lee<sup>4</sup>, Yeon  
5   Kyoung Ham<sup>1</sup>, Young Jun Kim<sup>1</sup>, Ye Rin Lim<sup>1,3</sup>, Phuong Thi Hoang<sup>5</sup>, Yongjun Lee<sup>5</sup>, Seok-Won Lim<sup>6</sup>, Jun-  
6   Mo Kim<sup>6</sup>, Seungchan Cho<sup>4</sup>, Jin-Won Song<sup>4</sup>, Sukchan Lee<sup>5\*</sup> and Won-Keun Kim<sup>2,3\*</sup>

7  
8   <sup>1</sup> Novelgen Co., Ltd., R&D center, 77, Changnyong-daero 256 beon-gil, Yeongtong-gu, Suwon-si,  
9   Gyeonggi-do, Republic of Korea

10   <sup>2</sup> Department of Microbiology, College of Medicine, Hallym University, Seoul, Republic of Korea

11   <sup>3</sup> Institute of Medical Science, College of Medicine, Hallym University, Chuncheon, Republic of Korea

12   <sup>4</sup> Department of Microbiology, Korea University College of Medicine, Seoul, Republic of Korea

13   <sup>5</sup> College of Biotechnology and Bioengineering, Sungkyunkwan University, Suwon, Republic of Korea

14   <sup>6</sup> Animal Functional Genomics & Bioinformatics Lab., Department of Animal Science and Technology,  
15   Chung-Ang University, Anseong, Gyeonggi-do, Republic of Korea

16  
17   \*Corresponding author

18   Email: wkkim1061@hallym.ac.kr (W-KK) and cell4u@skku.edu (S-CL)

19  
20   ¶These authors contributed equally to this work.

## 25 **Abstract**

26 The current pandemic severe acute respiratory syndrome coronavirus 2 (SARS-CoV-2) pose a  
27 critical public health threat worldwide. Coronaviruses (subfamily Orthocoronavirinae, family  
28 Coronaviridae, order Nidovirales) are a group of enveloped positive-sense single-stranded RNA  
29 viruses. Six pathogenic human coronaviruses, likely zoonotic viruses, cause the common cold in  
30 humans. A new emerging coronavirus, SARS-CoV-2, become a crucial etiology for the  
31 Coronavirus-induced disease 19 (COVID-19). However, effective therapeutics and vaccines  
32 against multiple coronaviruses remain unavailable. This study aimed to investigate an antiviral  
33 molecule, single chain variable fragment (scFv), against SARS-CoV-2 and other coronaviruses.  
34 3D8, a recombinant scFv, exhibits broad-spectrum antiviral activity against DNA and RNA viruses  
35 owing to its nucleic acid-hydrolyzing property. Here, we report that 3D8 scFv inhibited the  
36 replication of SARS-CoV-2, human coronavirus OC43 (HCoV-OC43), and porcine epidemic  
37 diarrhea virus (PEDV). Our results revealed the prophylactic and therapeutic effects of 3D8 scFv  
38 against SARS-CoV-2 in Vero E6 cells. Immunoblot and plaque assays showed the absence of  
39 coronavirus nucleoproteins and infectious particles in 3D8 scFv-treated cells, respectively. In  
40 addition, we observed the antiviral effects of 3D8 against HCoV-OC43 and PEDV. In conclusion,  
41 this study provides insights into the broad-spectrum antiviral agent of 3D8 scFv; thus, it could be  
42 considered a potential antiviral countermeasure against SARS-CoV-2 and zoonotic coronaviruses.

43

### 44 **Key points (Main message):**

- 45 1. 3D8, a nucleic acid-hydrolyzing scFv, exhibits potent prophylactic and therapeutic  
46 antiviral effects on SARS-CoV-2.

47 2. 3D8 exhibits broad-spectrum antiviral activity against multiple coronaviruses: hCoV OC43  
48 and PEDV.

49 3. 3D8 potentially degrades viral RNA.

50

## 51 **Introduction**

52 Coronaviruses (subfamily Orthocoronavirinae in the family Coronaviridae of the order  
53 Nidovirales) belong a group of enveloped viruses containing a single-stranded positive-sense RNA  
54 genome (1, 2). Divergent coronaviruses constitute four genetic lineage groups, including  
55 alphacoronaviruses, betacoronaviruses, gammacoronaviruses, and deltacoronaviruses. These  
56 viruses infect a broad range of natural reservoir hosts, including humans, bats, rodents, pigs, and  
57 camels (3). Currently, six coronavirus species cause infectious diseases in humans. Four  
58 coronaviruses, human coronavirus OC43 (HCoV-OC43), 229E, NL63, and HKU1, induce flu-like  
59 common cold symptoms in immunocompromised individuals (4, 5). Two highly transmissible and  
60 pathogenic viruses, severe acute respiratory syndrome coronavirus 1 (SARS-CoV-1) and Middle  
61 East respiratory syndrome coronavirus (MERS-CoV), are associated with fatal illness involving  
62 pneumonia and respiratory disorders (6). In late December 2019, the city of Wuhan, in the Hubei  
63 province of China, reported a few cases of patients with severe pneumonia of an unknown  
64 etiological agent (7), which was identified as the novel coronavirus disease (COVID-19) caused  
65 by SARS-CoV-2 (8). SARS-CoV-2 has several similarities to SARS-CoV and binds to the  
66 common host cell receptor, angiotensin-converting enzyme 2 (ACE-2), and Transmembrane  
67 Serine Protease 2 (TMPRSS2) (9, 10); however, the novel strain is genetically distinct from SARS-  
68 CoV-1 (11). The novel coronavirus SARS-CoV-2 is transmitted through species barriers from bats  
69 to humans (12). COVID-19 is characterized by influenza-like symptoms ranging from mild to

70 severe lung injury as well as multi-organ failure, leading to death in patients with comorbidities  
71 (13). This novel virus has led to a global pandemic, which resulted in unparalleled public health  
72 emergencies (14). As of November 24, 2020, it has rapidly spread to 220 countries and territories,  
73 infecting over 58.7 million people including more than 1.38 million deaths (15)  
74 [<https://covid19.who.int>].

75 The rapid and widespread emergence of SARS-CoV-2 presents the urgent need for antiviral  
76 countermeasures (4). Currently, there are no available therapeutics against human coronaviruses.

77 A variety of antivirals are repositioning on clinical trials Nucleoside analogues (remdesivir,  
78 favipiravir and ribavirin), protease inhibitors (disulfiram, lopinavir and ritonavir), antiparasitic  
79 drugs (chloroquine and hydrochloroquine), pegylated interferons, monoclonal antibodies,  
80 oligonucleotide-based therapies, peptides and small-molecule drugs are contemplated for possible  
81 therapeutic agents against SARS-CoV-2 (16, 17). In particular, remdesivir, which inhibits viral  
82 RNA polymerases, is proposed as a potent antiviral against SARS-CoV-2 and clinical  
83 improvement has been observed in patients under compassionate use (18, 19)

84 3D8, a 27-kDa recombinant antibody fragment, is a single chain variable fragment (scFv) that  
85 comprises a variable region of a heavy chain covalently linked to the corresponding variable region  
86 of a light chain. It was originally found in autoimmune-prone Murphy Roths Large (MRL) mice  
87 (20). The 3D8 scFv possessing the nucleic acid hydrolyzing activity degrades viral DNA and/or  
88 mRNA in the infected cells (21, 22). This protein has the broad-spectrum antiviral effects against  
89 herpes simplex virus (HSV), influenza virus, and pseudorabies (PRV) virus *in vitro*. 3D8 exhibited  
90 *in vivo* antiviral therapeutic effects against PRV in C57BL/6 mice. The transmission of avian  
91 influenza and bronchitis viruses was suppressed in transgenic chickens expressing the 3D8 scFv

92 (23-26). However, the antiviral activity of the 3D8 scFv against SARS-CoV-2 and other  
93 coronaviruses remains unknown.

94 Here, this study aimed to investigate the antiviral activity of 3D8 scFv against emerging  
95 coronaviruses *in vitro*. These data provide insight into a broad-spectrum antiviral agent of scFv  
96 against SARS-CoV-2 and multiplex coronaviruses.

97

## 98 **Results**

### 99 **3D8 inhibits SARS-CoV-2 in a dose-dependent manner**

100 To determine the antiviral activity of the 3D8 scFv against SARS-CoV-2, different concentrations  
101 of the scFv were applied to Vero E6 cells after virus challenge. SARS-CoV-2 replication in cultures  
102 treated with various doses of 3D8 was quantified using RT-qPCR (**Fig 1A**). The replication of  
103 SARS-CoV-2 significantly decreased in a 3D8 dose-dependent manner. The 10  $\mu$ M and 5  $\mu$ M  
104 concentrations of 3D8 effectively inhibited viral replication by up to approximately 90% and 75%,  
105 respectively, compared to the non-treatment group. The production of infectious virus particles was  
106 quantified by performing the plaque assay (**Fig 1B**). The viral titer of SARS-CoV-2 was reduced in  
107 a 3D8 dose-dependent manner. In particular, when treated with 10  $\mu$ M of 3D8, the titer of the virus  
108 was reduced by 10 times compared to the non-treatment group. Continual treatment with 3D8  
109 showed antiviral activity against SARS-CoV-2 at an effective concentration (EC50) of 4.25  $\mu$ M  
110 (**Fig 1C**). Moreover, this scFv did not show cytotoxicity in Vero E6 cells treated with the 3D8 scFv  
111 at concentrations ranging from 1  $\mu$ M to 10  $\mu$ M (**Fig 1D**). However, cytotoxicity was noted at a dose  
112 of 40  $\mu$ M.

113

### 114 **3D8 effectively inhibits SARS-CoV-2 in pretreated cells (prophylactic effect)**

115 We determined the prophylactic antiviral activity of the 3D8 scFv against SARS-CoV-2 in  
116 pretreated cell cultures. A significant reduction in the SARS-CoV-2 N gene copies was observed  
117 upon treatment with 10  $\mu$ M 3D8 scFv (**Fig 2A**). The gene copy number of the SARS-CoV-2 E gene  
118 and RdRp gene was reduced by 99.6% and 99.4%, respectively (data not shown). The N protein of  
119 SARS-CoV-2 was not observed after treatment with the 3D8 scFv (**Fig 2B**). Furthermore, we  
120 determined the inhibitory effect of 3D8 on the production of infectious particles of SARS-CoV-2.  
121 The production of infectious virus particles was more than 10 times lower in the scFv-treated group  
122 than in the control group (**Fig 2C**). Collectively, these data demonstrated that 3D8 has a  
123 prophylactic effect on SARS-CoV-2 infection.

124

### 125 **3D8 effectively inhibits SARS-CoV-2 in post-treated cells (therapeutic effect)**

126 To determine the therapeutic effect of 3D8 at 2 h post-infection (p.i.), we assessed the inhibitory  
127 activity of SARS-CoV-2 based on the reduction of the relative gene copy number (**Fig 2D**). 3D8  
128 treatment resulted in a decrease in the gene copy number of the N gene by 63.4%. Western blot  
129 analysis revealed the absence of N protein expression in the 3D8-treated samples (**Fig 2E**). The  
130 production of infectious particles of SARS-CoV-2 in the 3D8-treated group was 10 times lower  
131 than that in the control group (**Fig 2F**). The reduced viral gene copy number, lack of infectious  
132 virus particles, and absence of N protein expression indicated the therapeutic effect of 3D8 upon  
133 SARS-CoV-2 infection.

134

### 135 **3D8 possesses broad-spectrum antiviral activity against multiple coronaviruses**

136 To determine the antiviral activity of 3D8 against other coronaviruses, viral gene copies and  
137 infectious particles were examined after HCoV-OC43 and PEDV infections. The 3D8-treated group

138 revealed effective inhibition of viral replication upon HCoV-OC43 infection. The load of HCoV-  
139 OC43 RNA was significantly reduced in a 3D8 dose-dependent manner (**Fig 3A**). The expression  
140 of viral proteins was inhibited upon treatment with 3D8 (**Fig 3B**). 3D8 effectively inhibited the  
141 replication of HCoV-OC43 with the EC<sub>50</sub> value of 1.40 μM (**Fig 3C**). Immunohistochemistry  
142 analysis exhibited a reduction in HCoV-OC43 replication upon 3D8 treatment (**Fig 3D**).  
143 Treatment with 3D8 resulted in the effective inhibition of viral replication upon PEDV infection.  
144 The load of PEDV RNA was significantly suppressed in a 3D8 dose-dependent manner (**Fig 4A**).  
145 The expression of viral proteins was reduced upon treatment with 3D8 (**Fig 4B**). The EC<sub>50</sub> value of  
146 3D8 against PEDV was 1.10 μM (**Fig 4C**). Immunohistochemistry analysis revealed a reduction in  
147 PEDV replication upon 3D8 treatment (**Fig 4D**). These data demonstrated the broad-spectrum  
148 activity of 3D8 against multiple zoonotic coronaviruses.

149

## 150 **Discussion**

151 Three novel human coronaviruses have emerged during the past two decades (3, 5). The outbreak  
152 of COVID-19 occurred in late December in Wuhan (China) and rapidly became a global pandemic  
153 (7). The public health emergency caused by the SARS-CoV-2 outbreak presents the demand for  
154 countermeasures against emerging and re-emerging zoonotic coronaviruses. As the virus  
155 disseminates, efforts are being made to mitigate transmission via public health interventions  
156 including social distancing, quarantine, and contact tracing. However, therapeutics and vaccines  
157 against SARS-CoV-2 are urgently needed for the effective control of outbreaks. In this study, we  
158 demonstrated that 3D8, a nucleic acid-hydrolyzing scFv, inhibited the replication of SARS-CoV-2  
159 and multiple coronaviruses *in vitro*.

160

161 The scFv is a molecule derived from an antibody composed of variable region of heavy and light  
162 chains linked with peptides(20). scFv has applied for basic researches, biotechnological and  
163 medicinal applications such as cancer therapy and potential alternatives to conventional diagnostic  
164 approaches(25, 26). scFv has various advantages over traditional monoclonal antibodies such as  
165 ease of genetic manipulation, rapid molecular design and characterization, greatly reduced size,  
166 production of antibodies against viral proteins, and various expression systems. Neutralizing scFv  
167 against N protein protects piglets from PEDV infection (27). The orally administered piglets had  
168 no or mild clinical symptoms, intestinal lesions and significantly increased survival rates. 3D8 is a  
169 unique scFv that possesses a broad-spectrum nuclease activity and confers antiviral protection from  
170 a variety of viruses including DNA and RNA viruses (**Figure 5**) (28, 29). 3D8 scFv previously  
171 showed the antiviral effect against infectious Bronchitis virus, a member of gammacoronaviruses  
172 in transgenic chickens expressing 3D8 scFv (24). The antiviral activity of 3D8 scFv against SARS-  
173 CoV-2 and other coronaviruses remained to be examined.

174 Our study demonstrated that 3D8 confers effective antiviral activity against SARS-CoV-2, HCoV-  
175 OC43, and PEDV *in vitro*. The function of 3D8 inhibited the replication of multiple coronaviruses  
176 in a dose-dependent manner. The reduction of infectious virus particles accounted for the nuclease  
177 activity of 3D8, indicating the degradation of viral nucleic acids prohibited the production of viral  
178 genomes and proteins. Upon infection with HCoV-OC43 and PEDV, the therapeutic treatment of  
179 3D8 scFv showed the inhibition of viral replication and protein expression, indicating the antiviral  
180 activity of multiple coronaviruses. The previous studies demonstrated the biochemical  
181 characteristics and robust antiviral activity of 3D8 scFv against classical swine fever virus and  
182 herpes simplex virus *in vitro* (22, 28). The 3D8 expressing transgenic mice and chickens exhibited  
183 the *in vivo* antiviral activity against influenza virus and PRV (23, 29). The cellular entry mechanism



184 of 3D8 revealed a caveolin-dependent manner without a carrier (30). The intranasal transfer of 3D8  
185 scFv into a mouse described the presence of the protein in the epithelial barrier of lung tissues (31).  
186 Taken together, the 3D8, a nucleic-acid hydrolyzing mini-antibody, may be a potential candidate  
187 for antivirals due to the broad spectrum, the easy penetration to the cell, and the accessibility to the  
188 lung *in vivo*.

189 Infection of coronaviruses have significantly impacted on humans and livestock (32). However,  
190 the effective antiviral countermeasures against the viruses are still unavailable. HCoV-OC43,  
191 belongs to lineage betacoronaviruses, is associated with mild common cold in humans. HCoV-  
192 OC43 infection occurs frequently in early childhood and causes acute respiratory tract illness,  
193 pneumonia and croup (33). PEDV, a member of alphacoronaviruses, is a highly contagious  
194 coronavirus that causes severe diarrhea and death in neonatal piglets (27). All of age groups are  
195 highly susceptible to PEDV infection with neonatal piglets under 2 weeks of age, showing the  
196 highest mortality rates. In this study, HCoV-OC43 and PEDV were effectively reduced for the  
197 replication and protein synthesis. These results suggest 3D8 may be a potential antiviral agent  
198 against viral threats for the public health and livestock industry.

199 In this study, there is the limitation. The absence of *in vivo* study is a major limitation in animal  
200 models. To address this, future studies are needed to illustrate the *in vivo* inhibitory effect of 3D8  
201 scFv using the animal models. Although the previous studies presented the nuclease activity of 3D8  
202 scFv, the precise cellular mechanism and *in vivo* effects of the administration remain to be further  
203 investigated.

204 In conclusion, 3D8 scFv confers effective antiviral activity against the SARS-CoV-2 and multiple  
205 coronaviruses. This study provides insights into the broad-spectrum antiviral countermeasure of  
206 scFv; thus, it can be a potential antiviral agent against the emerging virus outbreak.

207

## 208 **Materials and methods**

### 209 **Ethics**

210 An antiviral study of 3D8 against SARS-CoV-2 was performed at the Biosafety Level-3 facilities  
211 at Hallym Clinical and Translational Science Institute, Hallym University, Chuncheon, South  
212 Korea, under guidelines and protocols approved by institutional biosafety requirements.  
213 Experiments involving OC43 and PEDV were performed at Biosafety Level-2 facilities.

214

### 215 **Cells and viruses**

216 African green monkey kidney epithelial Vero cells (ATCC<sup>®</sup> CCL-81) and Vero E6 cells (ATCC<sup>®</sup>  
217 CRL-1586) were maintained in Dulbecco's Modified Eagle's Medium (DMEM, Lonza, USA 12-  
218 604F, BioWhittaker<sup>®</sup>) supplemented with 10% fetal bovine serum (FBS, Gibco, USA), 1% 10 mM  
219 HEPES in 0.85% NaCl (Lonza, USA, 17-737E, BioWhittaker<sup>®</sup>), and 100 U/mL penicillin and 100  
220 µg/mL streptomycin (Pen Strep, Gibco, USA, 15070-063). Cell cultures were maintained at 37 °C  
221 and 5% CO<sub>2</sub>. SARS-CoV-2 was obtained from the Korea Centers for Disease Control and  
222 Prevention (KCDC). The virus was propagated in Vero E6 cells, and the infectious titer was  
223 determined by plaque assay in Vero E6 cells. hCoV OC43 and PEDV were obtained from KCDC  
224 and the Korean Animal and Plant Quarantine Agency (KAPQA), respectively.

225

### 226 **Plaque assay**

227 Vero E6 cells were plated at  $1 \times 10^6$  cells per well in 6-well plates (Corning) and incubated at 37  
228 °C with 5% CO<sub>2</sub>. A confluent monolayer of cells was washed with phosphate-buffered saline (PBS,  
229 Lonza, USA, BioWhittaker<sup>®</sup>), infected with ten-fold serial dilutions of viral suspension prepared in

230 serum-free maintenance media (DMEM only), and incubated at 37 °C. Following infection for 1 h  
231 with intermittent shaking at 15-min intervals, the viral inoculum was aspirated, and overlay media  
232 (DMEM/F12 media) containing 4% bovine serum albumin (BSA), 2 mM glutamine, 2.5% sodium  
233 bicarbonate (NaHCO<sub>3</sub>), 10 mM HEPES, 50 mg/mL DEAE dextran, 100 U/mL penicillin, 100  
234 µg/mL streptomycin (Pen Strep), and 0.6% immunodiffusion-grade Oxoid agar was added. After  
235 4–5 days of incubation at 37 °C with 5% CO<sub>2</sub>, fixation with 4% paraformaldehyde (Biosesang,  
236 F1119Z21 YR) was performed. After overnight incubation, the overlay agar media was flicked  
237 using a metal spatula, and the plates were stained with crystal violet (0.1% crystal violet in 20%  
238 methanol) for 10 min. Plaques were enumerated, and viral titers were quantified.

239

#### 240 ***In vitro* antiviral activity**

241 Cells were seeded at  $1 \times 10^6$  cells per well and allowed to adhere for 24 h at 37 °C with 5% CO<sub>2</sub> in  
242 6-well plates (Corning). After incubation, the cells were washed twice with PBS, and the viruses  
243 were adsorbed at different multiplicity of infection (MOI) for 2 h at 37 °C. The plates were manually  
244 rocked to ensure uniform and efficient distribution of inoculum every 15–20 min. After adsorption,  
245 the cells were treated with 3D8 at different concentrations (2-h post-infection treatment of 3D8).  
246 About 1 mL of DMEM supplemented with 10% FBS and antibiotics was added to the cells, which  
247 were then incubated. In case of pre-treatment, Vero E6 cells were treated with 3D8 and incubated  
248 overnight before the virus challenge. At 48 hour post infection (hpi), supernatants and cells were  
249 harvested. The samples were stored at -80 °C until use.

250

#### 251 **Real-time quantitative polymerase chain reaction**

252 Total RNA was extracted using TRIzol (Ambion, Life Technologies). Reverse transcription of  
253 RNA into cDNA was performed using a High Capacity RNA-to-cDNA kit (Applied Biosystems,  
254 Thermo Fisher Scientific) according to the manufacturer's protocol. Briefly, 1 µg of RNA was used,  
255 and cDNA was synthesized using an oligo deoxythymine (dT) kit. The reaction was performed at  
256 37 °C for 60 min, followed by 95 °C for 5 min.

257 Viral RNA was quantified via real-time quantitative PCR (RT-qPCR) using a Power SYBR® Green  
258 PCR Master Mix (Applied Biosystems, Thermo Fisher Scientific) with primers for SARS-CoV-2  
259 and other coronaviruses and GAPDH as an endogenous control. Details of the primers used are  
260 provided in the supplementary information.

261

#### 262 **Cell viability assay**

263 Vero-E6 cells were seeded at  $4 \times 10^4$  cells per well in 96-well plates and incubated for 24 h at 37  
264 °C in a CO<sub>2</sub> atmosphere. NVG308 protein was applied from 1 µM to 40 µM; the cells were  
265 incubated for 48 h at 37 °C. After incubation, 10 µL of MTT solution (Intron) was added to each  
266 well, and the cells were incubated for 3 h. After adding 100 µL of DMSO, the viability of the Vero-  
267 E6 cells was measured using a microplate reader at 595 nm.

268

#### 269 **Immunoblot assays**

270 Cells were lysed using RIPA lysis buffer (Santa Cruz Biotechnology, SC-24948). Cell lysates were  
271 subjected to 10% sodium dodecyl sulfate-polyacrylamide gel electrophoresis (SDS-PAGE) and  
272 transferred to a nitrocellulose membrane using a wet method. After transmembrane transfer, the  
273 lysates were incubated with primary antibodies (anti-SARS-CoV-2, Invitrogen, PA1-41098; anti-  
274 PEDV, MEDIAN, #9191; anti-hCoV OC43, LS-bio, LS-C79764; and anti-hGAPDH rabbit IgG,

275 Sigma-Aldrich, MFCD01322099 and Abcam, ab9485) overnight at 4 °C and then incubated with  
276 an anti-rabbit IgG-HRP conjugate for 1 h at room temperature. The membrane reaction with ECL  
277 solution (Bio-Rad, 170-5061) was observed and confirmed via the chemiluminescence mode using  
278 ImageQuant LAS 500 (GE).

279

## 280 **Immunocytochemistry**

281 Immunocytochemistry for identifying the antiviral effects of 3D8 against the coronaviruses was  
282 conducted as described previously [36]. Vero E6 cells were seeded at  $1.5 \times 10^4$  cells in an 8-well  
283 chamber and incubated for 24 h. PEDV and hCoV-OC43 were infected at MOI = 0.002 and 0.02,  
284 respectively, for 2 h. About 5  $\mu$ M (185  $\mu$ g/mL) of purified 3D8 and 1% P/S antibiotics  
285 (Gibco,15140122) were added to DMEM media (Hyclone, SH30243.01) supplemented with 10%  
286 FBS (Welgene gold serum, S-001-07), and the media was incubated at 37 °C with 5% CO<sub>2</sub>. The  
287 cells were washed with PBS and fixed for 15 min in ice-cold methanol at room temperature. The  
288 cells were then permeabilized with permeabilization buffer (Biolegend, #421002) for 10 min at  
289 room temperature. After blocking with 1% BSA + 0.3 M glycine (22.52 mg/mL) + PBST buffer  
290 for 1 h at room temperature, primary antibodies for detecting PEDV (mouse, anti-PEDV  
291 monoclonal Ab, Mybio, #MBS313516), hCoV-OC43 (mouse, anti-OC43 monoclonal Ab, LSBio,  
292 #LS-C79764), and 3D8 (polyclonal rabbit IgG Serum Ab) were incubated overnight at 4 °C.  
293 Following this, PEDV and hCoV-OC43 were incubated with TRITC-conjugated anti-mouse Ab  
294 (1:500) (Abcam, #ab6786), and 3D8 was incubated with Alexa 488-conjugated anti-rabbit Ab  
295 (1:1000) (Abcam, #ab150077). The nuclei were stained with Hoechst (Thermo Fisher, #62249)  
296 during the last 10 min of incubation at room temperature. Cells were mounted in mounting medium  
297 (VECTASHIELD, #H-1200) and observed using a NIKON A1R (Eclipse A1Rsi and Eclipse Ti-E).

298

## 299 **Statistical analysis**

300 Statistical analyses of data were performed in Graph Pad Prism 8.

301

## 302 **Funding**

303 This work was supported by Novelgen (6R190101532S000100) and the Research Program To  
304 Solve Social Issues of the National Research Foundation of Korea (NRF) funded by the Ministry  
305 of Science and ICT (NRF-2017M3A9E4061992).

306

## 307 **Conflict of interest**

308 The authors declare that the research was conducted in the absence of any commercial or financial  
309 relationships that could be construed as a potential conflict of interest.

310

## 311 **References**

- 312 1. S. H. Sun *et al.*, A Mouse Model of SARS-CoV-2 Infection and Pathogenesis. *Cell Host*  
313 *Microbe*, (2020).
- 314 2. Y. Fan, K. Zhao, Z. L. Shi, P. Zhou, Bat Coronaviruses in China. *Viruses* **11**, (2019).
- 315 3. A. C. S. Timothy P. Sheahan, Shuntai Zhou, et al, An orally bioavailable broad-spectrum  
316 antiviral inhibits SARS-CoV-2 in human airway epithelial cell cultures and multiple coronaviruses  
317 in mice. *Science Translational Medicine* **12**, 15.
- 318 4. A. J. Pruijssers *et al.*, Remdesivir potently inhibits SARS-CoV-2 in human lung cells and  
319 chimeric SARS-CoV expressing the SARS-CoV-2 RNA polymerase in mice. *bioRxiv*, (2020).

- 320 5. D. Blanco-Melo *et al.*, SARS-CoV-2 launches a unique transcriptional signature from *in*  
321 *vitro*, *ex vivo* and *in vivo* systems. (2020).
- 322 6. X. Xie *et al.*, An Infectious cDNA Clone of SARS-CoV-2. *Cell Host Microbe* **27**, 841-848  
323 e843 (2020).
- 324 7. N. Zhu *et al.*, A Novel Coronavirus from Patients with Pneumonia in China, 2019. *N Engl*  
325 *J Med* **382**, 727-733 (2020).
- 326 8. J. Harcourt *et al.*, Severe Acute Respiratory Syndrome Coronavirus 2 from Patient with  
327 Coronavirus Disease, United States. *Emerg Infect Dis* **26**, 1266-1273 (2020).
- 328 9. R. Lu *et al.*, Genomic characterisation and epidemiology of 2019 novel coronavirus:  
329 implications for virus origins and receptor binding. *The Lancet* **395**, 565-574 (2020).
- 330 10. M. Hoffmann *et al.*, SARS-CoV-2 Cell Entry Depends on ACE2 and TMPRSS2 and Is  
331 Blocked by a Clinically Proven Protease Inhibitor. *Cell* **181**, 271-280 e278 (2020).
- 332 11. Z. Chen *et al.*, From SARS-CoV to Wuhan 2019-nCoV Outbreak: Similarity of Early  
333 Epidemic and Prediction of Future Trends. (2020).
- 334 12. A. E. Gorbalenya *et al.*, Severe acute respiratory syndrome-related coronavirus: The species  
335 and its viruses – a statement of the Coronavirus Study Group. *Nature Microbiology*, 536-544  
336 (2020).
- 337 13. V. Monteil *et al.*, Inhibition of SARS-CoV-2 Infections in Engineered Human Tissues  
338 Using Clinical-Grade Soluble Human ACE2. *Cell* **181**, 905-913 e907 (2020).
- 339 14. A. B. Gussow *et al.*, Genomic determinants of pathogenicity in SARS-CoV-2 and other  
340 human coronaviruses. *Proc Natl Acad Sci U S A* **117**, 15193-15199 (2020).
- 341 15. World Health Organization. (2020), vol. 2020.

- 342 16. G. Li, E. De Clercq, Therapeutic options for the 2019 novel coronavirus (2019-nCoV). *Nat*  
343 *Rev Drug Discov* **19**, 149-150 (2020).
- 344 17. S. G. V. Rosa, W. C. Santos, Clinical trials on drug repositioning for COVID-19 treatment.  
345 *Rev Panam Salud Publica* **44**, e40 (2020).
- 346 18. M. Wang *et al.*, Remdesivir and chloroquine effectively inhibit the recently emerged novel  
347 coronavirus (2019-nCoV) *in vitro*. *Cell Res* **30**, 269-271 (2020).
- 348 19. A. J. Pruijssers *et al.*, Remdesivir Inhibits SARS-CoV-2 in Human Lung Cells and Chimeric  
349 SARS-CoV Expressing the SARS-CoV-2 RNA Polymerase in Mice. *Cell Rep* **32**, 107940 (2020).
- 350 20. **M. H. Kwon** *et al.*, Production and Characterization of an anti-idiotypic single chain fv that  
351 recognizes an anti-DNA antibody.pdf. *Immunological Investigations* **31**, 205-218.
- 352 21. Y. R. Kim *et al.*, Heavy and light chain variable single domains of an anti-DNA binding  
353 antibody hydrolyze both double- and single-stranded DNAs without sequence specificity. *J Biol*  
354 *Chem* **281**, 15287-15295 (2006).
- 355 22. H. R. Jun *et al.*, An RNA-hydrolyzing recombinant antibody exhibits an antiviral activity  
356 against classical swine fever virus. *Biochem Biophys Res Commun* **395**, 484-489 (2010).
- 357 23. S. June Byun *et al.*, Transgenic Chickens Expressing the 3D8 Single Chain Variable  
358 Fragment Protein Suppress Avian Influenza Transmission. *Sci Rep* **7**, 5938 (2017).
- 359 24. G. Lee *et al.*, The 3D8 single chain variable fragment protein suppress infectious bronchitis  
360 virus transmission in the transgenic chickens. *Res Vet Sci* **123**, 293-297 (2019).
- 361 25. J. Lee *et al.*, Functional stability of 3D8 scFv, a nucleic acid-hydrolyzing single chain  
362 antibody, under different biochemical and physical conditions. *Int J Pharm* **496**, 561-570 (2015).
- 363 26. Z. A. Ahmad *et al.*, scFv antibody: principles and clinical application. *Clin Dev Immunol*  
364 **2012**, 980250 (2012).



- 365 27. F. Zhang *et al.*, Single Chain Fragment Variable (scFv) Antibodies Targeting the Spike  
366 Protein of Porcine Epidemic Diarrhea Virus Provide Protection against Viral Infection in Piglets.  
367 *Viruses* **11**, (2019).
- 368 28. G. Lee *et al.*, A nucleic-acid hydrolyzing single chain antibody confers resistance to DNA  
369 virus infection in hela cells and C57BL/6 mice. *PLoS Pathog* **10**, e1004208 (2014).
- 370 29. G. Lee *et al.*, Therapeutic Strategy for the Prevention of Pseudorabies Virus Infection in  
371 C57BL/6 Mice by 3D8 scFv with Intrinsic Nuclease Activity. *Mol Cells* **38**, 773-780 (2015).
- 372 30. J. Y. Jang *et al.*, A nucleic acid-hydrolyzing antibody penetrates into cells via caveolae-  
373 mediated endocytosis, localizes in the cytosol and exhibits cytotoxicity. *Cell Mol Life Sci* **66**, 1985-  
374 1997 (2009).
- 375 31. S. Cho *et al.*, Preventive Activity against Influenza (H1N1) Virus by Intranasally Delivered  
376 RNA-Hydrolyzing Antibody in Respiratory Epithelial Cells of Mice. *Viruses* **7**, 5133-5144 (2015).
- 377 32. B. N. Fields, D. M. Knipe, P. M. Howley, *Fields' Virology*. (Wolters Kluwer  
378 Health/Lippincott Williams & Wilkins, 2007).
- 379 33. R. Dijkman *et al.*, The dominance of human coronavirus OC43 and NL63 infections in  
380 infants. *J Clin Virol* **53**, 135-139 (2012).

381

## 382 **Figure captions**

### 383 **Fig 1. 3D8 exhibits antiviral activity against SARS-CoV-2 in a dose-dependent manner**

384 (A) Dose-dependent inhibition of SARS-CoV-2 by 3D8. Vero E6 cells were infected with SARS-  
385 CoV-2 and treated with a range of 3D8 concentrations at 2 hpi. At 48 hpi, the cells were harvested,  
386 and the viral RNA level was determined using RT-qPCR. (B) Supernatants from the 3D8-treated  
387 samples were collected, and a plaque assay was performed to determine the infectious viral titer.

388 The clear zone indicates the plaques formed. (C) Percent inhibition of SARS-CoV-2 replication by  
389 3D8 in Vero E6 cells. Vero E6 cells were infected with SARS-CoV-2, and 3D8 was added at 2 hpi.  
390 Replication was measured through quantification of the virus RNA level. (D) Cytotoxicity testing  
391 of 3D8 in Vero E6 cells was performed by applying a range of 3D8 concentrations in uninfected  
392 cell cultures. Error bars indicate the standard deviation of triplicate measurements in a  
393 representative experiment. (\*\*\*) $p < 0.001$ , One-way ANOVA test; ns: non-significant)

394

## 395 **Fig 2. Prophylactic and therapeutic antiviral effects of 3D8 against COVID-19**

396 (A) Inhibition of SARS-CoV-2 by 3D8 in pretreated cell cultures. Vero E6 cells pretreated with  
397 3D8 were infected with SARS-CoV-2. At 48 hpi, the cells were harvested, and the viral copy  
398 number was quantified based on the relative concentration of the N gene. (B) Vero E6 cells  
399 pretreated with 3D8 were infected with SARS-CoV-2. At 48 hpi, the cells were lysed using RIPA  
400 lysis buffer. Cell lysates were electrophoresed on SDS-PAGE and transferred to nitrocellulose  
401 membranes. After incubation with primary antibodies, the membranes were observed using a  
402 chemiluminescence reader. (C) Supernatants were harvested from 3D8-pretreated cell cultures  
403 infected with SARS-CoV-2, and the infectious viral titer was determined using a plaque assay. The  
404 clear zone indicates the plaques formed. (D) Inhibition of SARS-CoV-2 by 3D8 in post-treated cell  
405 cultures. Vero E6 cells were infected with SARS-CoV-2 and treated with 3D8 at 2 hpi. At 48 hpi,  
406 the cells were harvested, and the viral copy number was quantified based on the relative  
407 concentration of the N gene. (E) Vero E6 cells were infected with SARS-CoV-2 and treated with  
408 3D8 at 2 hpi. At 48 hpi, the cells were lysed with RIPA lysis buffer. Cell lysates were  
409 electrophoresed on SDS-PAGE and transferred to nitrocellulose membranes. After incubation with  
410 primary antibodies, the membranes were observed using a chemiluminescence reader. (F)

411 Supernatants were harvested from 3D8 post-treated cell cultures infected with SARS-CoV-2, and  
412 the infectious viral titer was determined using a plaque assay. The clear zone indicates the plaques  
413 formed. (\*\*p<0.001; \*\*\*\*p<0.0001, One-way ANOVA test; ns: non-significant)

414

415 **Fig 3. *In vitro* antiviral effect of 3D8 against human coronavirus OC43**

416 (A) Dose-dependent inhibition of OC43 by 3D8. Vero E6 cells were infected with OC43 and treated  
417 with a range of 3D8 concentrations at 2 hpi. At 48 hpi, the cells were harvested, and the virus copy  
418 number was determined via qPCR. (B) Vero E6 cells were infected with OC43 and treated with  
419 3D8 at 2 hpi. At 48 hpi, the cells were lysed with RIPA lysis buffer. Cell lysates were  
420 electrophoresed on SDS-PAGE and transferred to nitrocellulose membranes. After incubation with  
421 primary antibodies, the membranes were observed using a chemiluminescence reader. (C) Percent  
422 inhibition of OC43 replication by 3D8 in Vero E6 cells. Vero E6 cells were infected with OC43,  
423 and 3D8 was added at 2 hpi. Replication was measured through quantification of the virus RNA  
424 level. (D) Vero E6 cells were treated with OC43 and treated with 3D8 at 2 hpi. At 48 hpi, the cells  
425 were washed with PBS and fixed using methanol. Then, they were permeabilized with buffer and  
426 blocked with BSA. The cells were then incubated with primary antibodies overnight. After  
427 incubation, TRITC-conjugated anti-mouse and Alexa 488-conjugated anti-rabbit antibodies were  
428 added. Hoechst was used to stain the nucleus. (\*p< 0.05; \*\*\*p<0.001, One-way ANOVA test; ns:  
429 non-significant)

430

431 **Fig 4. *In vitro* antiviral effect of different concentrations of 3D8 against PEDV**

432 (A) Dose-dependent inhibition of PEDV by 3D8. Vero E6 cells were infected with PEDV and  
433 treated with a range of 3D8 concentrations at 2 hpi. At 48 hpi, the cells were harvested, and the

434 virus RNA level was determined via qPCR. (B) Vero E6 cells were infected with PEDV and treated  
435 with 3D8 at 2 hpi. At 48 hpi, the cells were lysed with RIPA lysis buffer. Cell lysates were  
436 electrophoresed on SDS-PAGE and transferred to nitrocellulose membranes. After incubation with  
437 primary antibodies, the membranes were observed using a chemiluminescence reader. (C) Percent  
438 inhibition of PEDV replication by 3D8 in Vero E6 cells. Vero E6 cells were infected with PEDV  
439 and treated with 3D8 at 2 hpi. Replication was measured through quantification of the virus RNA  
440 level. (D) Vero E6 cells were treated with PEDV and treated with 3D8 at 2 hpi. At 48 hpi, the cells  
441 were washed with PBS and fixed with methanol. Then, they were permeabilized with buffer and  
442 blocked with BSA. The cells were incubated with primary antibodies overnight. After incubation,  
443 TRITC-conjugated anti-mouse and Alexa 488-conjugated anti-rabbit antibodies were added.  
444 Hoechst was used to stain the nucleus. (\* $p < 0.05$ ; \*\* $p < 0.01$ , One-way ANOVA test; ns: non-  
445 significant)

446

#### 447 **Fig 5. Suggested mode of action for 3D8**

448 3D8, a single chain variable fragment (scFv), is internalized into the cell through caveolae-mediated  
449 endocytosis. After release from the endosomal compartment, 3D8 localizes to the cytosol. In the  
450 cytosol, it binds to the viral nucleic acid and degrades it to prevent its amplification, thus inhibiting  
451 viral growth. 3D8 confers nuclease activity without sequence specificity and hydrolyzes viral RNA  
452 genomes or transcripts.

453

454

455

456

457 **Figures.**

458 **Fig 1.**

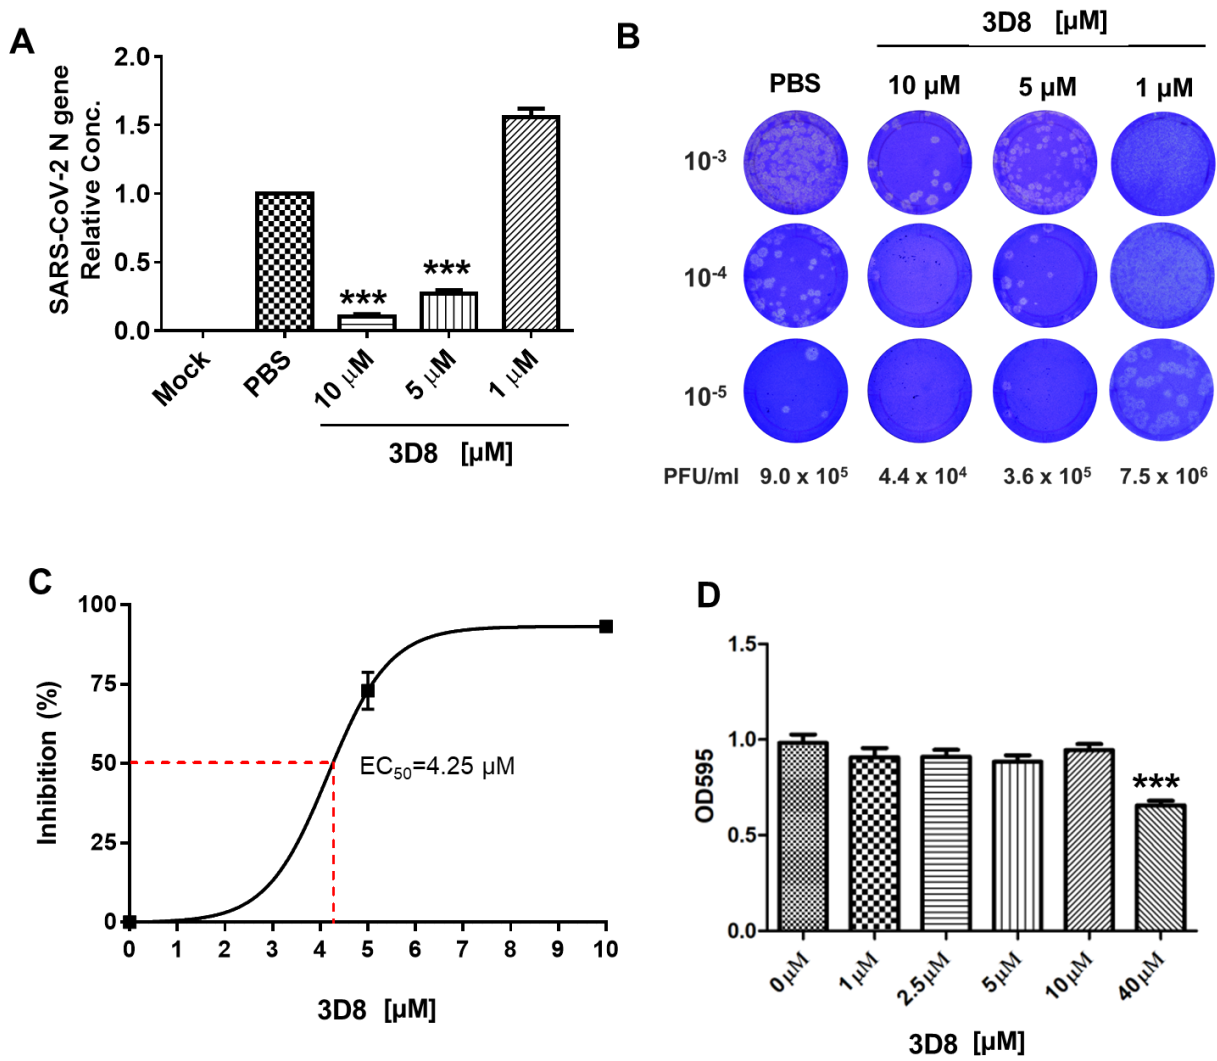

459

460

461

462

463

464

465

466 **Fig 2.**

467

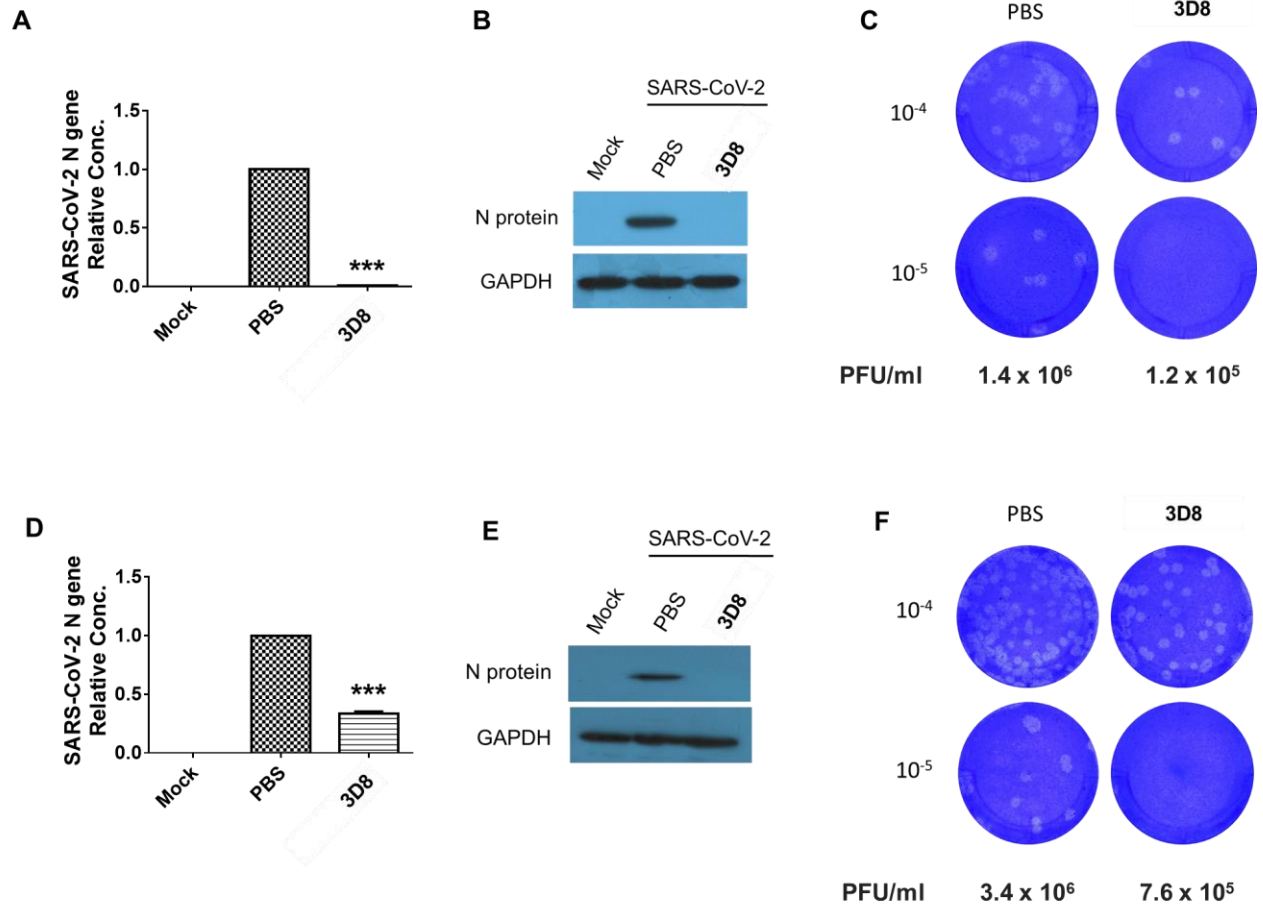

468

469 **Fig 3.**

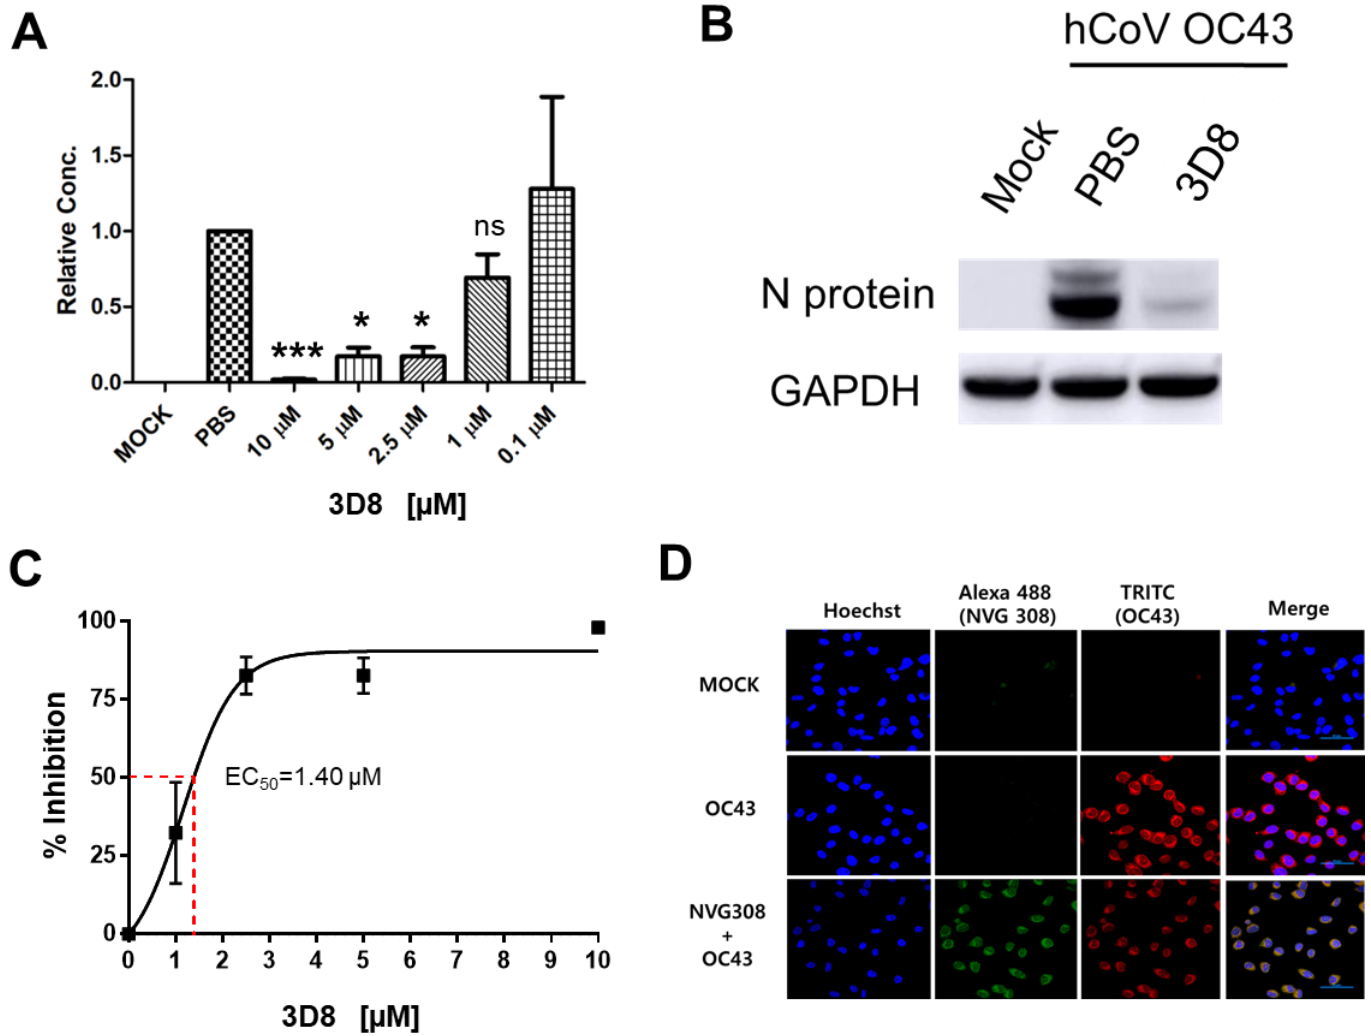

470

471

472

473

474

475

476

477

478 **Fig 4.**

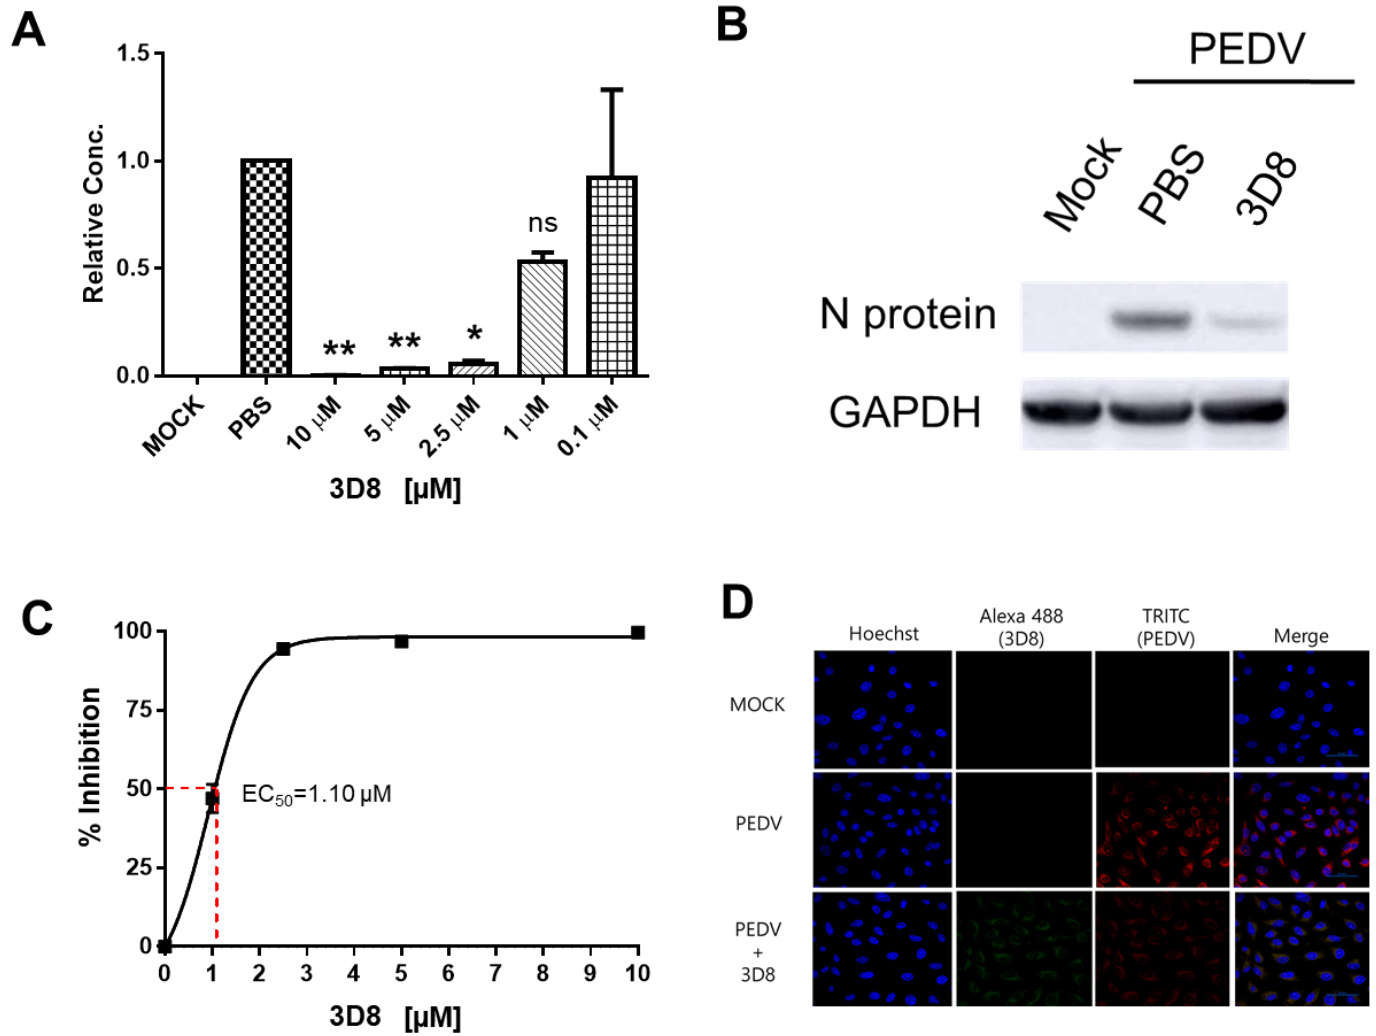

479

480

481

482

483

484

485

486



487 **Fig 5.**

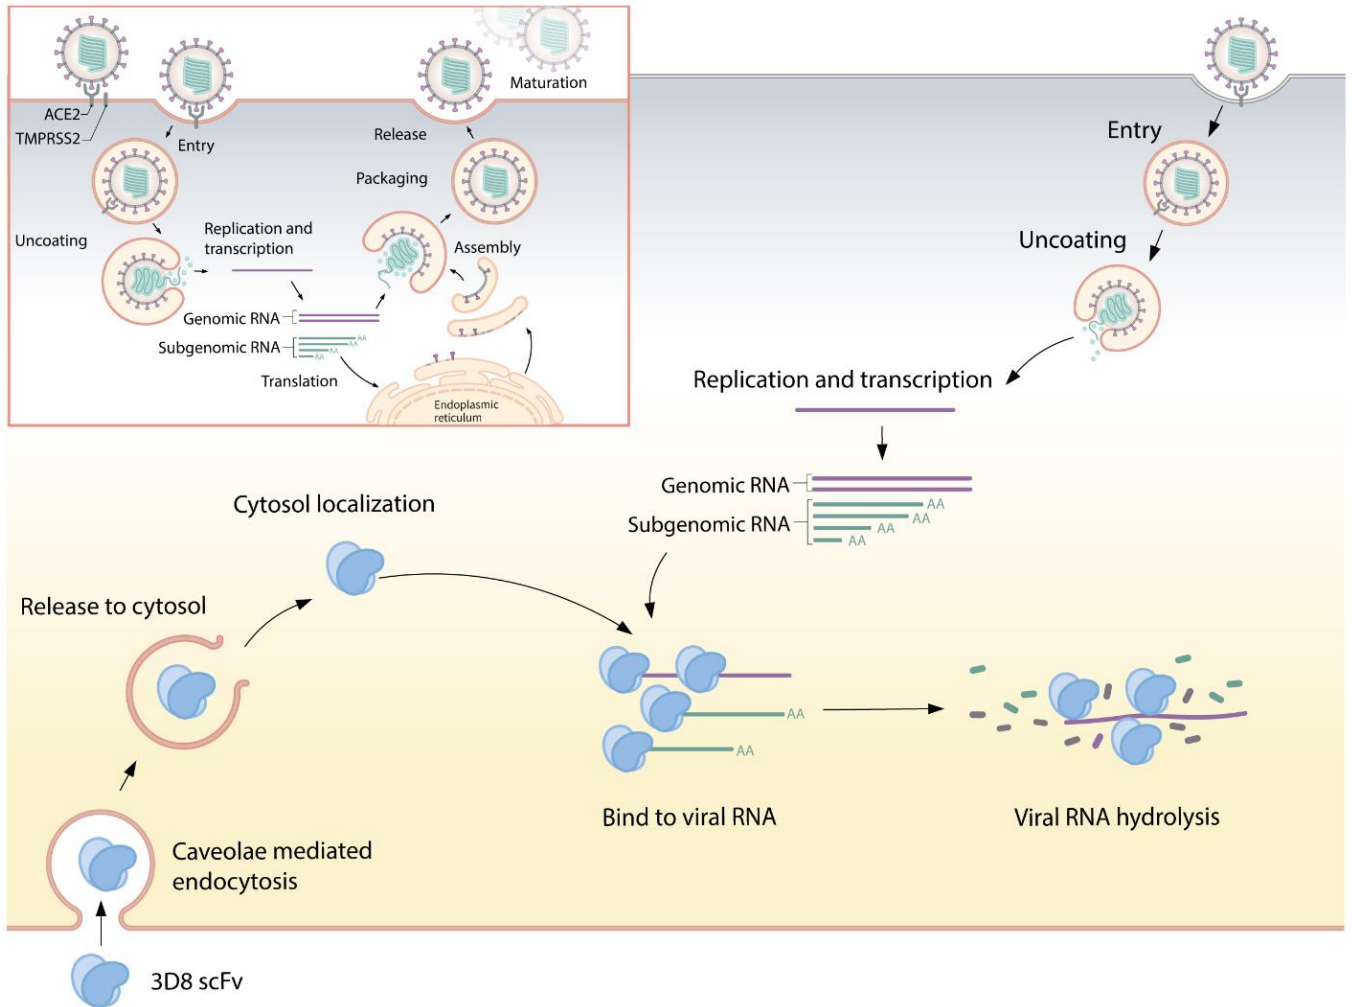

488
